# Supplementary material for: Regulation of Serum Sphingolipids in Andean Children Born and Living at High Altitude (3775 m)
Source: MDPI journal article supplement (doi:10.3390/ijms20112835), 2019-06-11
Supplement: s1 [file s1]

|               | Total Cholesterol |       | HDL-C  |       | CT/HDL |       | LDL-C  |       | Vit. D |       | Glycemia |       | HOMA-IR |       | Insulin |       | TG     |        |
|---------------|-------------------|-------|--------|-------|--------|-------|--------|-------|--------|-------|----------|-------|---------|-------|---------|-------|--------|--------|
|               | r                 | p     | r      | p     | r      | p     | r      | p     | r      | p     | r        | p     | r       | p     | r       | p     | r      | p      |
| UW Total Cers | -0.303            | 0.509 | 0.066  | 0.888 | -0.373 | 0.411 | -0.440 | 0.323 | -0.292 | 0.526 | -0.393   | 0.383 | -0.320  | 0.485 | -0.310  | 0.498 | -0.026 | 0.957  |
| NW Total Cers | 0.091             | 0.632 | -0.238 | 0.206 | 0.319  | 0.085 | 0.107  | 0.574 | -0.400 | 0.028 | 0.035    | 0.852 | 0.389   | 0.036 | 0.418   | 0.021 | 0.379  | 0.039  |
| OW Total Cers | 0.721             | 0.005 | 0.335  | 0.263 | 0.280  | 0.355 | 0.619  | 0.024 | -0.312 | 0.299 | 0.028    | 0.928 | -0.097  | 0.753 | -0.109  | 0.723 | 0.359  | 0.228  |
| O Total Cers  | 0.440             | 0.237 | -0.321 | 0.399 | 0.544  | 0.135 | -0.268 | 0.486 | -0.035 | 0.929 | 0.683    | 0.043 | 0.477   | 0.195 | 0.420   | 0.260 | 0.3285 | 0.4269 |
| UW Total SMs  | 0.478             | 0.278 | 0.854  | 0.015 | -0.368 | 0.417 | 0.311  | 0.497 | -0.052 | 0.912 | 0.167    | 0.721 | -0.267  | 0.564 | -0.281  | 0.541 | -0.176 | 0.706  |
| NW Total SMs  | -0.093            | 0.624 | -0.049 | 0.798 | 0.024  | 0.901 | -0.029 | 0.880 | -0.091 | 0.634 | -0.095   | 0.616 | -0.257  | 0.171 | -0.240  | 0.202 | -0.040 | 0.834  |
| OW Total SMs  | 0.721             | 0.005 | 0.603  | 0.029 | 0.027  | 0.931 | 0.655  | 0.015 | -0.064 | 0.834 | 0.055    | 0.859 | 0.189   | 0.537 | 0.188   | 0.538 | -0.010 | 0.975  |
| O Total SMs   | 0.225             | 0.560 | 0.264  | 0.492 | -0.259 | 0.498 | 0.183  | 0.637 | 0.425  | 0.254 | 0.152    | 0.696 | -0.152  | 0.696 | -0.203  | 0.601 | -0.018 | 0.975  |
| UW Total S1P  | 0.384             | 0.396 | 0.400  | 0.374 | 0.006  | 0.990 | 0.385  | 0.394 | 0.557  | 0.194 | -0.386   | 0.392 | -0.512  | 0.241 | -0.459  | 0.301 | -0.166 | 0.723  |
| NW Total S1P  | -0.183            | 0.333 | -0.375 | 0.041 | 0.350  | 0.058 | 0.052  | 0.786 | 0.015  | 0.936 | -0.010   | 0.957 | 0.049   | 0.798 | 0.014   | 0.941 | 0.205  | 0.278  |
| OW Total S1P  | -0.528            | 0.067 | -0.176 | 0.566 | -0.376 | 0.205 | -0.691 | 0.011 | 0.077  | 0.806 | 0.271    | 0.368 | 0.187   | 0.539 | 0.132   | 0.669 | 0.344  | 0.249  |
| O Total S1P   | -0.348            | 0.358 | -0.491 | 0.180 | -0.008 | 0.988 | -0.464 | 0.208 | 0.637  | 0.065 | 0.410    | 0.273 | 0.458   | 0.215 | 0.451   | 0.224 | 0.360  | 0.339  |

**Supplementary Table 2.** p-values from two tailed test, r value from Pearson's correlation (regular) or from Spearman's correlation (bold).
